# Supplementary material for: Cortical bone maturation in mice requires SOCS3 suppression of gp130/STAT3 signalling in osteocytes
Source: PubMed Central journal article supplement (PMC7253175; doi:10.7554/elife.56666), 2020-05-27

**Source data: Figure 4**

Uncropped gels for phospho-STAT3 (left panels) and total STAT3 / pan-actin (right panels) for calvarial samples from *Socs3<sup>ff</sup>* and *Dmp1<sup>Cre</sup>.Socs3<sup>ff</sup>* mice treated with OSM (A), LIF (B) or IL-11 (C). Details of molecular weight markers and legends for the gels are in Figure 4.

**A**

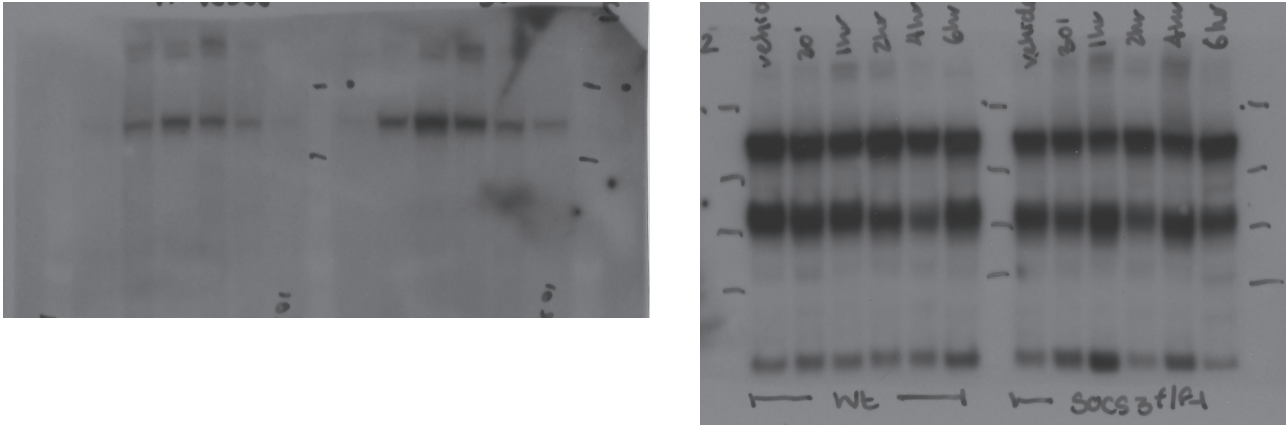

**B**

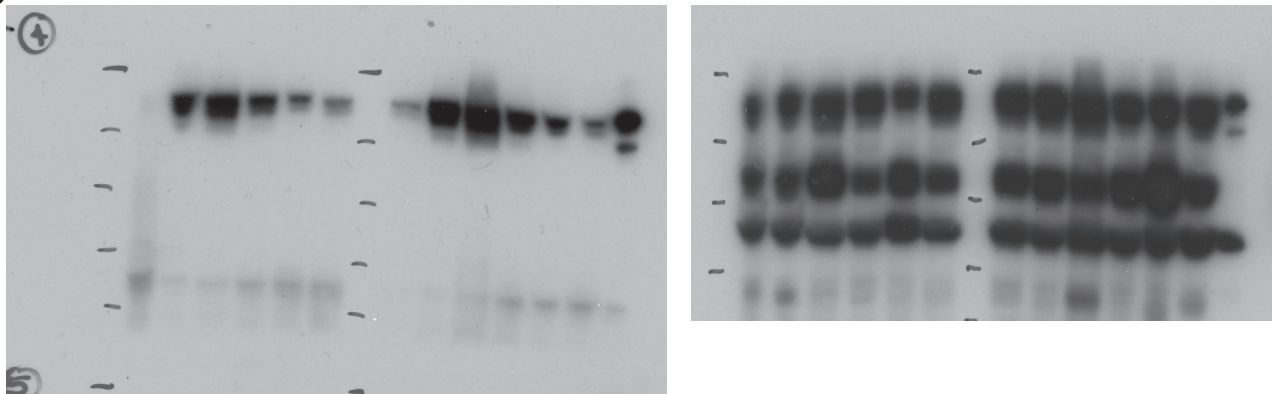

**C**

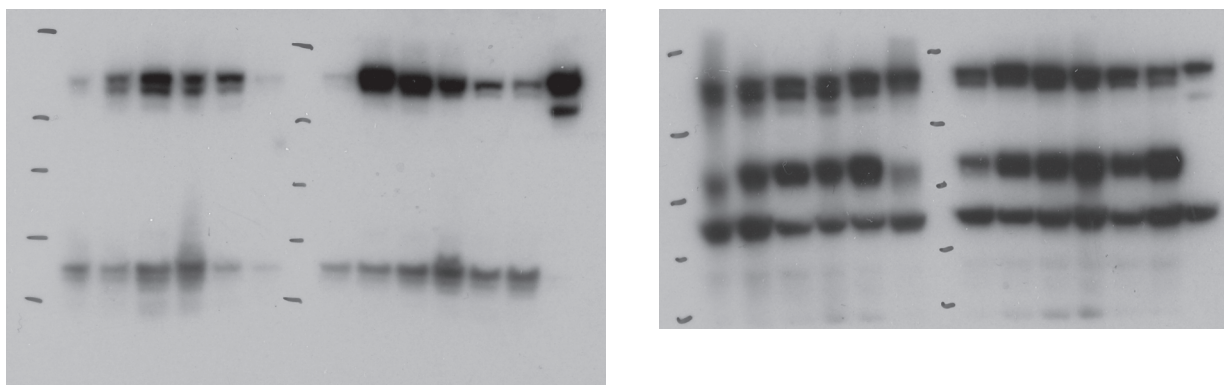

Supplement: elife-56666-fig4-data1.pdf [file elife-56666-fig4-data1.pdf]
