# Supplementary material for: Cortical bone maturation in mice requires SOCS3 suppression of gp130/STAT3 signalling in osteocytes
Source: eLife. 2020 May 27;9:e56666. doi: 10.7554/eLife.56666 (PMC7253175; doi:10.7554/eLife.56666)
Supplement: Figure 1—source data 1. [file elife-56666-fig1-data1.xlsx]

## Sheet: %cort por
					12 week old	15 week old	16 week old
Sample Number					Cortical Porosity	Cortical Porosity	Cortical Porosity
DSR	597	f	tg	f/f	5.75968	7.17892	5.66419
DSR	602	f	tg	f/f	8.06115	6.65744	4.65665
DSR	603	f	tg	f/f	12.9083	6.95394	5.78526
DSR	604	f	tg	f/f	12.4966	5.56528	5.09044
DSR	607	f	tg	f/f	4.7723	3.18737	2.86394
DSR	608	f	tg	f/f	2.01743	1.57915	0.71607
DSR	615	f	tg	f/f	9.68799	9.55481	9.03265
DSR	616	f	tg	f/f	9.79115	8.90563	9.53143
DSR	618	f	tg	f/f	11.124	7.79686	7.85916
DSRG.L	43	f	tg	wt	1.57305	1.00685	0.54521
DSRG.L	45	f	tg	wt	1.11007	0.55032	0.37491
il6st	843	f	tg	wt	1.91158	0.68679	0.31216
il6st	844	f	tg	wt	1.75759	0.72605	0.78731
il6st	845	f	tg	wt	1.20004	0.53891	0.57221
il6st	846	f	tg	wt	1.49341	0.59148	0.48405
il6st	852	f	tg	wt	1.34515	0.74606	0.44647
il6st	853	f	tg	wt	1.53626	0.79864	0.48371
il6st	872	f	tg	wt	1.51693	0.94002	0.48881
il6st	873	f	tg	wt	2.73909	1.47548	0.8525
il6st	874	f	tg	wt	1.33158	0.77857	0.52253
