# Supplementary material for: Cortical bone maturation in mice requires SOCS3 suppression of gp130/STAT3 signalling in osteocytes
Source: eLife. 2020 May 27;9:e56666. doi: 10.7554/eLife.56666 (PMC7253175; doi:10.7554/eLife.56666)
Supplement: Figure 2—source data 1. [file elife-56666-fig2-data1.xlsx]

## Sheet: Sheet1
		0.632-1.143mg/cm3 CaHA											1.143-1.528mg/cm3 CaHA											>1.528mg/cm3 CaHA
Dmp1Cre.Socs3f/f	12 weeks	31.1761	32.1044	35.6342	39.2113	24.4188	18.4169	31.6985	28.9556	31.6215	29.2657	32.7337	19.4787	20.3007	23.8202	24.0681	27.7158	28.1186	24.2717	25.6992	24.3948	24.9987	20.4812	2.36991	0.375397	1.00036	0.252062	0.019722	0.01468	0.872981	0.124787	0.52806	1.12594	0.022616
Dmp1Cre.Socs3f/f	15 weeks	19.454	19.5277	24.1546	25.8819	14.8383	13.0251	28.4281	26.375	26.0245	23.3858		26.0668	27.4063	26.6264	27.5772	24.378	22.5954	23.8247	26.5707	26.877	26.8137		12.0774	8.26457	11.4644	9.36753	15.586	14.2553	9.86276	10.092	8.87973	10.3023
Dmp1Cre	12 weeks	15.0791	14.9542	14.9262	14.6536	15.625	14.1445	15.1856	19.0402	16.2126	16.3477	16.0729	23.0102	23.76	22.8274	22.4688	20.7405	23.5733	23.6014	18.0983	21.2217	18.266	22.7983	0.558694	0.727286	1.19079	2.01717	0.888534	0.756295	0.028753	1.00508	0.232185	0.189299	1.76059
Dmp1Cre	15 weeks	11.2435	10.412	9.56228	10.8897	10.8338	11.854	11.4964	11.5261	10.2152			18.2777	19.9439	18.372	17.8145	18.7311	19.9247	18.7024	19.5134	19.8851			13.5541	15.2003	15.9077	15.8858	11.5165	11.7107	13.6863	15.7952	17.452
